# Supplementary material for: Activated carbon immersed in water—the origin of linear correlation between enthalpy of immersion and oxygen content studied by molecular dynamics simulation
Source: Royal Society of Chemistry journal article supplement (doi:10.1039/c003894f), 2010-01-01
Supplement: c003894f.pdf [file c003894f.pdf]

### The details of the BG method:

The dimensions of simulation boxes:

- Series 1,2 and 3:  $6.5 \times 6.5 \times 6.5$  nm
- Series 1 x 1.125:  $7.0 \times 7.0 \times 7.0$  nm
- Series 1 x 1.25:  $7.5 \times 7.5 \times 7.5$  nm
- Series 1x 1.50:  $8.5 \times 8.5 \times 8.5$  nm

Periodic boundary conditions applied in all three dimensions.

Density of nodes:  $200 \times 200 \times 200$

Atom radius:

$$r_C = 0.17 \text{ nm}$$

$$r_O = 0.15 \text{ nm}$$

Average effective micropore diameters from BG method were calculated using:

$$d_{mi,av} = \frac{\sum_{d \leq 2 \text{ nm}} d \cdot P(d)}{\sum_{d \leq 2 \text{ nm}} P(d)}$$

**Table ESI 1.** The average micropore diameters of all VPCs.

| <i>d<sub>mi,av</sub></i> [nm] |       |               |       |               |       |                     |       |                    |       |                   |       |
|-------------------------------|-------|---------------|-------|---------------|-------|---------------------|-------|--------------------|-------|-------------------|-------|
| <b>S1_000</b>                 | 0.712 | <b>S2_000</b> | 0.712 | <b>S3_000</b> | 0.712 | <b>S1_000x1.125</b> | 0.875 | <b>S1_000x1.25</b> | 1.058 | <b>S1_000x1.5</b> | 1.461 |
| <b>S1_060</b>                 | 0.707 | <b>S2_060</b> | 0.707 | <b>S3_060</b> | 0.706 | <b>S1_060x1.125</b> | 0.864 | <b>S1_060x1.25</b> | 1.047 | <b>S1_060x1.5</b> | 1.445 |
| <b>S1_120</b>                 | 0.692 | <b>S2_120</b> | 0.703 | <b>S3_120</b> | 0.697 | <b>S1_120x1.125</b> | 0.848 | <b>S1_120x1.25</b> | 1.029 | <b>S1_120x1.5</b> | 1.417 |
| <b>S1_180</b>                 | 0.690 | <b>S2_180</b> | 0.692 | <b>S3_180</b> | 0.691 | <b>S1_180x1.125</b> | 0.841 | <b>S1_180x1.25</b> | 1.019 | <b>S1_180x1.5</b> | 1.405 |
| <b>S1_240</b>                 | 0.685 | <b>S2_240</b> | 0.681 | <b>S3_240</b> | 0.685 | <b>S1_240x1.125</b> | 0.830 | <b>S1_240x1.25</b> | 1.005 | <b>S1_240x1.5</b> | 1.390 |

**Table ESI 2.** Characteristics of simulation boxes.  $N_{H2O}$  is the number of water molecules in the simulation box having starting diameters  $L_{box,x}$ ,  $L_{box,y}$ , and  $L_{box,z}$ , respectively. Method 1 – uses Gromax Genbox procedure, method 2 – simulation in water sphere.

| Structure                                                                      | method 1  |             |             |             | method 2  |             |             |             |
|--------------------------------------------------------------------------------|-----------|-------------|-------------|-------------|-----------|-------------|-------------|-------------|
|                                                                                | $N_{H2O}$ | $L_{box,x}$ | $L_{box,y}$ | $L_{box,z}$ | $N_{H2O}$ | $L_{box,x}$ | $L_{box,y}$ | $L_{box,z}$ |
|                                                                                |           | [nm]        |             |             |           | [nm]        |             |             |
| <i>carbonyl groups introduced randomly</i>                                     |           |             |             |             |           |             |             |             |
| <b>S1_000</b>                                                                  | 3567      | 5.395       | 5.057       | 5.057       | 6252      | 6.500       | 6.500       | 6.500       |
| <b>S1_060</b>                                                                  | 3701      | 5.418       | 5.114       | 5.133       | 6252      | 6.500       | 6.500       | 6.500       |
| <b>S1_120</b>                                                                  | 3672      | 5.418       | 5.114       | 5.133       | 6252      | 6.500       | 6.500       | 6.500       |
| <b>S1_180</b>                                                                  | 3659      | 5.429       | 5.115       | 5.133       | 6252      | 6.500       | 6.500       | 6.500       |
| <b>S1_240</b>                                                                  | 3715      | 5.429       | 5.170       | 5.144       | 6252      | 6.500       | 6.500       | 6.500       |
| <i>carbonyl groups introduced randomly</i>                                     |           |             |             |             |           |             |             |             |
| <b>S2_000</b>                                                                  | 3567      | 5.395       | 5.057       | 5.057       | 6252      | 6.500       | 6.500       | 6.500       |
| <b>S2_060</b>                                                                  | 3551      | 5.406       | 5.057       | 5.057       | 6252      | 6.500       | 6.500       | 6.500       |
| <b>S2_120</b>                                                                  | 3551      | 5.406       | 5.058       | 5.057       | 6252      | 6.500       | 6.500       | 6.500       |
| <b>S2_180</b>                                                                  | 3534      | 5.406       | 5.058       | 5.068       | 6252      | 6.500       | 6.500       | 6.500       |
| <b>S2_240</b>                                                                  | 3548      | 5.406       | 5.071       | 5.127       | 6252      | 6.500       | 6.500       | 6.500       |
| <i>carbonyl groups on the edges of structures</i>                              |           |             |             |             |           |             |             |             |
| <b>S3_000</b>                                                                  | 3567      | 5.395       | 5.057       | 5.057       | 6252      | 6.500       | 6.500       | 6.500       |
| <b>S3_060</b>                                                                  | 3593      | 5.42        | 5.071       | 5.057       | 6252      | 6.500       | 6.500       | 6.500       |
| <b>S3_120</b>                                                                  | 3713      | 5.42        | 5.18        | 5.078       | 6252      | 6.500       | 6.500       | 6.500       |
| <b>S3_180</b>                                                                  | 3684      | 5.42        | 5.18        | 5.078       | 6252      | 6.500       | 6.500       | 6.500       |
| <b>S3_240</b>                                                                  | 3671      | 5.42        | 5.18        | 5.109       | 6252      | 6.500       | 6.500       | 6.500       |
| <i>carbonyl groups introduced randomly – structures with shifted fragments</i> |           |             |             |             |           |             |             |             |
| <b>S1_000x1.125</b>                                                            | 4847      | 5.886       | 5.433       | 5.494       | n.a.      |             |             |             |
| <b>S1_060x1.125</b>                                                            | 5111      | 5.909       | 5.528       | 5.570       |           |             |             |             |
| <b>S1_120x1.125</b>                                                            | 5082      | 5.909       | 5.528       | 5.570       |           |             |             |             |
| <b>S1_180x1.125</b>                                                            | 5055      | 5.920       | 5.529       | 5.570       |           |             |             |             |
| <b>S1_240x1.125</b>                                                            | 5100      | 5.920       | 5.546       | 5.582       |           |             |             |             |
| <i>carbonyl groups introduced randomly – structures with shifted fragments</i> |           |             |             |             |           |             |             |             |
| <b>S1_000x1.25</b>                                                             | 6200      | 6.377       | 5.824       | 5.932       | n.a.      |             |             |             |
| <b>S1_060x1.25</b>                                                             | 6549      | 6.399       | 5.944       | 6.008       |           |             |             |             |
| <b>S1_120x1.25</b>                                                             | 6526      | 6.399       | 5.944       | 6.008       |           |             |             |             |
| <b>S1_180x1.25</b>                                                             | 6515      | 6.410       | 5.945       | 6.008       |           |             |             |             |
| <b>S1_240x1.25</b>                                                             | 6530      | 6.410       | 5.958       | 6.019       |           |             |             |             |
| <i>carbonyl groups introduced randomly – structures with shifted fragments</i> |           |             |             |             |           |             |             |             |
| <b>S1_000x1.5</b>                                                              | 9918      | 7.359       | 6.653       | 6.806       | n.a.      |             |             |             |
| <b>S1_060x1.5</b>                                                              | 10367     | 7.381       | 6.773       | 6.882       |           |             |             |             |
| <b>S1_120x1.5</b>                                                              | 10349     | 7.381       | 6.773       | 6.882       |           |             |             |             |
| <b>S1_180x1.5</b>                                                              | 10335     | 7.392       | 6.787       | 6.893       |           |             |             |             |
| <b>S1_240x1.5</b>                                                              | 10369     | 7.392       | 6.787       | 6.893       |           |             |             |             |

**Table ESI 3.** The dependence between enthalpy of immersion and the percentage contents of oxygen.  $-\Delta H_i = A_1 \cdot \{O\} + A_0$

| <i>Series</i>    | <i>method 1</i> |         | <i>method 2</i> |         |
|------------------|-----------------|---------|-----------------|---------|
|                  | $A_1$           | $A_0$   | $A_1$           | $A_0$   |
|                  | [J/g/%]         | [J/g]   | [J/g/%]         | [J/g]   |
| <b>1</b>         | 14.70           | - 45.71 | 14.30           | - 29.59 |
| <b>2</b>         | 14.74           | - 39.44 | 14.61           | - 29.69 |
| <b>3</b>         | 14.46           | - 42.13 | 14.35           | - 27.26 |
| <b>1 x 1.125</b> | 13.67           | -14.78  | -               | -       |
| <b>1 x 1.25</b>  | 13.57           | 19.09   | -               | -       |
| <b>1 x 1.50</b>  | 13.45           | 31.89   | -               | -       |

**Table ESI 4.** The dependence between enthalpy of immersion and the polar surface area values.

$$-\Delta H_i = B_1 \cdot S_{polar} + B_0$$

| <i>Series</i>    | <i>method 1</i>     |         | <i>method 2</i>     |         |
|------------------|---------------------|---------|---------------------|---------|
|                  | $B_1$               | $B_0$   | $B_1$               | $B_0$   |
|                  | [J/m <sup>2</sup> ] | [J/g]   | [J/m <sup>2</sup> ] | [J/g]   |
| <b>1</b>         | 0.1699              | - 50.38 | 0.1652              | - 34.10 |
| <b>2</b>         | 0.1714              | - 41.76 | 0.1696              | - 31.78 |
| <b>3</b>         | 0.1592              | - 43.05 | 0.1578              | - 28.09 |
| <b>1 x 1.125</b> | 0.1245              | - 18.20 | -                   | -       |
| <b>1 x 1.25</b>  | 0.1098              | 13.96   | -                   | -       |
| <b>1 x 1.5</b>   | 0.1072              | 30.13   | -                   | -       |

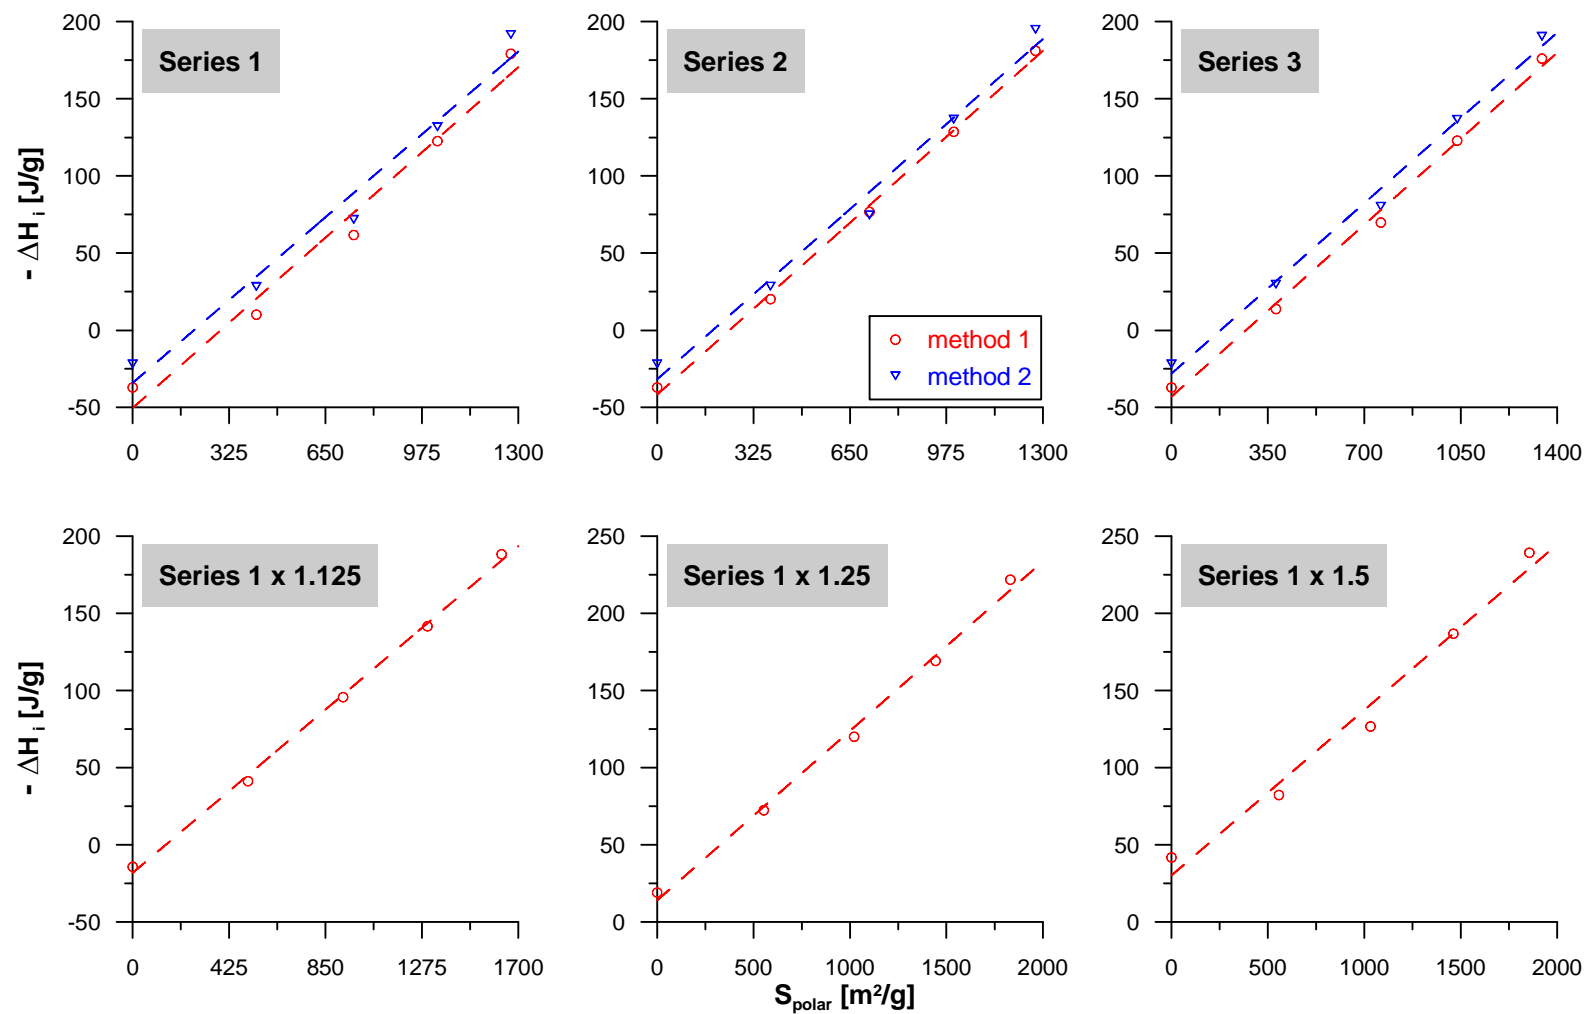

**Figure ESI 1.** The relation between enthalpy of immersion and polar surface area calculated from Vega ZZ.

**Table ESI 5.** The dependence between enthalpy of immersion and the ratio polar/nonpolar surface area.

$$-\Delta H_i = C_1 \cdot \frac{S_{polar}}{S_{nonpolar}} + C_0$$

| <i>Series</i>    | <i>method 1</i> |                | <i>method 2</i> |                |
|------------------|-----------------|----------------|-----------------|----------------|
|                  | $C_1$<br>[J/g]  | $C_0$<br>[J/g] | $C_1$<br>[J/g]  | $C_0$<br>[J/g] |
| <b>1</b>         | 318.9           | -32.89         | 310.9           | -17.36         |
| <b>2</b>         | 311.8           | -22.22         | 312.9           | -13.71         |
| <b>3</b>         | 288.9           | -24.27         | 287.3           | -9.74          |
| <b>1 x 1.125</b> | 303.0           | -1.13          | -               | -              |
| <b>1 x 1.25</b>  | 305.7           | 28.98          | -               | -              |
| <b>1 x 1.5</b>   | 309.4           | 43.62          | -               | -              |
